# Supplementary material for: Circulating exosome‐derived bona fide long non‐coding RNAs predicting the occurrence and metastasis of hepatocellular carcinoma
Source: PubMed Central journal article supplement (PMC6991696; doi:10.1111/jcmm.14783), 2019-12-07
Supplement: JCMM-24-1311-s001.pdf [file JCMM-24-1311-s001.pdf]

**Circulating exosome-derived bona fide long non-coding RNAs  
predicting the occurrence and metastasis of hepatocellular carcinoma**

**Yunjie Lu<sup>1,\*</sup>, Yunfei Duan<sup>1,\*</sup>, Qinghua Xu<sup>2</sup>, Li Zhang<sup>2</sup>, Weibo Chen<sup>1</sup>, Zhen Qu<sup>1</sup>,  
Baoqiang Wu<sup>1</sup>, Wensong Liu<sup>1</sup>, Longqing Shi<sup>1</sup>, Di Wu<sup>1</sup>, Yan Yang<sup>3</sup>, Xuemin Chen<sup>1,#</sup>,  
Donglin Sun<sup>1,#</sup>**

1 Department of Hepatobiliary Surgery, The First People's Hospital of Changzhou, The Third Hospital Affiliated to Soochow University, Changzhou, Jiangsu, China

2 Department of General Surgery, Liyang People's Hospital, Liyang, Jiangsu, China.

3 Department of Nephrology, The First People's Hospital of Changzhou, The Third Hospital Affiliated to Soochow University, Changzhou, Jiangsu, China

**Content:**

**Suppl Fig 1. Workflow for the exosome-derived lncRNA screening.**

**Suppl Fig 2. The detailed AUC value for each fingerprint in training**

**set.** VAR0002 to VAR0007 represent ENSG00000248932.1, ENST00000440688.1, ENST00000457302.2, AFP, the combination of the three lncRNAs, AFP plus the three lncRNAs. NC: normal control; CH: chronic hepatitis; HCC-N: HCC without metastasis; HCC-M: HCC with metastasis.

**Suppl Fig 3. The detailed AUC value for each fingerprint in validation**

**set.** VAR0002 to VAR0007 represent ENSG00000248932.1, ENST00000440688.1, ENST00000457302.2, AFP, the combination of the three lncRNAs, AFP plus the three lncRNAs. NC: normal control; CH: chronic hepatitis; HCC-N: HCC without metastasis; HCC-M: HCC with metastasis.

**Suppl Table 1. Clinicopathological features of surgical hepatocellular carcinoma (HCC), chronic hepatitis (CH) and cancer-free control samples.**

**Suppl Table 2. Clinicopathological features of surgical hepatocellular carcinoma (HCC) without metastasis(HCC-N) and with metastasis(HCC-M).**

**Suppl Table 3. Risk score analysis of in hepatocellular carcinoma (HCC) and cancer-free control plasma samples**

**Suppl Table 4. Risk score analysis of in hepatocellular carcinoma (HCC) and CH plasma samples.**

**Suppl Table 5, Risk score analysis of in hepatocellular carcinoma (HCC) metastasis and non-metastasis patients' plasma samples.**

**Suppl Table 6, Primers for Quantitative RT- PCR.**

**Supplementary Table1. Clinicopathological features of surgical hepatocellular carcinoma (HCC), chronic hepatitis (CH) and cancer-free control samples**

|                              | <b>HCC</b>  | <b>CH</b>   | <b>Control</b> | <b>P value</b>           |
|------------------------------|-------------|-------------|----------------|--------------------------|
| <b>N</b>                     | 200         | 200         | 200            |                          |
| <b>Age Mean (SE) year</b>    | 55.43(12.4) | 56.89(11.8) | 56.79(11.6)    | <b>0.44<sup>a</sup></b>  |
| <b>Sex (male/female)</b>     | 160/40      | 157/43      | 162/38         | <b>0.82<sup>b</sup></b>  |
| <b>Differentiation grade</b> |             |             |                |                          |
| Well                         | 96          |             |                |                          |
| Moderate                     | 61          |             |                |                          |
| Poorly                       | 43          |             |                |                          |
| <b>Tumor Size(cm)</b>        |             |             |                |                          |
| ≤5cm                         | 116         |             |                |                          |
| >5cm                         | 84          |             |                |                          |
| <b>Tumor Number</b>          |             |             |                |                          |
| Solitary                     | 89          |             |                |                          |
| Multiple                     | 111         |             |                |                          |
| <b>Tumor Capsular</b>        |             |             |                |                          |
| Incomplete                   | 14          |             |                |                          |
| Complete                     | 186         |             |                |                          |
| <b>AFP(ng/mL)</b>            | 32.7(13.3)  | 28.3(11.2)  | 18.9(3.2)      | <b>0.032<sup>a</sup></b> |
| <b>TNM stage(I:II:III)</b>   | 98: 67:35   |             |                |                          |
| <b>Metastasis</b>            |             |             |                |                          |
| Yes                          | 100         |             |                |                          |
| No                           | 100         |             |                |                          |
| <b>HBV/HCV</b>               |             |             |                |                          |
| Yes                          | 200         | 200         | /              | <b>1.00<sup>b</sup></b>  |
| No                           | 0           | 0           | /              |                          |

<sup>a</sup> Student t-test.

<sup>b</sup> Chi-square test.

**Supplementary Table2. Clinicopathological features of surgical hepatocellular carcinoma (HCC) without metastasis(HCC-N) and with metastasis(HCC-M).**

|                              | HCC- N      | HCC-M       | P value                 |
|------------------------------|-------------|-------------|-------------------------|
| <b>N</b>                     | 100         | 100         |                         |
| <b>Age Mean (SE) year</b>    | 56.12(11.5) | 55.89(11.3) | <b>0.33<sup>a</sup></b> |
| <b>Sex (male/female)</b>     | 78/22       | 82/18       | <b>0.48<sup>b</sup></b> |
| <b>Differentiation grade</b> |             |             | <b>0.69<sup>b</sup></b> |
| Well                         | 45          | 51          |                         |
| Moderate                     | 32          | 29          |                         |
| Poorly                       | 23          | 20          |                         |
| <b>Tumor Size(cm)</b>        |             |             | <b>0.39<sup>b</sup></b> |
| ≤5cm                         | 55          | 61          |                         |
| >5cm                         | 45          | 39          |                         |
| <b>Tumor Number</b>          |             |             | <b>0.67<sup>b</sup></b> |
| Solitary                     | 43          | 46          |                         |
| Multiple                     | 57          | 54          |                         |
| <b>Tumor Capsular</b>        |             |             | <b>0.58<sup>b</sup></b> |
| Incomplete                   | 8           | 6           |                         |
| Complete                     | 92          | 94          |                         |
| <b>AFP(ng/mL)</b>            | 31.8(10.8)  | 33.2(10.2)  | <b>0.12<sup>a</sup></b> |
| <b>TNM stage(I:II:III)</b>   | 45: 35:20   | 53:32:15    | <b>0.47<sup>b</sup></b> |
| <b>HBV/HCV</b>               |             |             | <b>1.00<sup>b</sup></b> |
| Yes                          | 100         | 100         |                         |
| No                           | 0           | 0           |                         |

<sup>a</sup> Student t-test.

<sup>b</sup> Chi-square test.

**Supplementary Table 3: Risk score analysis of in hepatocellular carcinoma HCC**

**and cancer-free control plasma samples**

| <b>Score</b>          | <b>0-5.438</b> | <b>5.438-9.126</b> | <b>PPV<sup>a</sup></b> | <b>NPV<sup>b</sup></b> |
|-----------------------|----------------|--------------------|------------------------|------------------------|
| <b>Training set</b>   |                |                    | 0.95                   | 0.95                   |
| HCC                   | 1              | 19                 |                        |                        |
| Control               | 19             | 1                  |                        |                        |
| <b>Validation set</b> |                |                    | 0.80                   | 0.95                   |
| HCC                   | 36             | 144                |                        |                        |
| Control               | 171            | 9                  |                        |                        |

<sup>a</sup> PPV, positive predictive value

<sup>b</sup> NPV, negative predictive value

**Supplementary Table 4: Risk score analysis of in hepatocellular carcinoma HCC**

**and CH plasma samples**

| <b>Score</b>          | <b>0-5.351</b> | <b>5.351-9.124</b> | <b>PPV<sup>a</sup></b> | <b>NPV<sup>b</sup></b> |
|-----------------------|----------------|--------------------|------------------------|------------------------|
| <b>Training set</b>   |                |                    | 0.90                   | 0.95                   |
| HCC                   | 2              | 18                 |                        |                        |
| CH                    | 19             | 1                  |                        |                        |
| <b>Validation set</b> |                |                    | 0.84                   | 0.80                   |
| HCC                   | 29             | 151                |                        |                        |
| CH                    | 144            | 36                 |                        |                        |

<sup>a</sup> PPV, positive predictive value

<sup>b</sup> NPV, negative predictive value

**Supplementary Table 5: Risk score analysis of in hepatocellular carcinoma(HCC)**

**metastasis and non-metastasis patients' plasma samples**

| <b>Score</b>          | <b>0-1.128</b> | <b>1.128-3.339</b> | <b>PPV<sup>a</sup></b> | <b>NPV<sup>b</sup></b> |
|-----------------------|----------------|--------------------|------------------------|------------------------|
| <b>Training set</b>   |                |                    | 0.90                   | 0.95                   |
| Metastasis            | 2              | 18                 |                        |                        |
| Non-metastasis        | 19             | 1                  |                        |                        |
| <b>Validation set</b> |                |                    | 0.90                   | 0.96                   |
| Metastasis            | 8              | 72                 |                        |                        |
| Non-metastasis        | 77             | 3                  |                        |                        |

<sup>a</sup> PPV, positive predictive value

<sup>b</sup> NPV, negative predictive value



**Supplementary Table 6. Primers for Quantitative RT- PCR**

| <b>Gene name</b>  | <b>All Patients</b> | <b>Sequence</b>         |
|-------------------|---------------------|-------------------------|
| XLOC_001120       | Forward Primer      | GCGGGCTTAGTAGCTTCAGG    |
|                   | Reverse Primer      | GTTGGGTAGTTGCCGTCTCC    |
| ENSG00000243766.2 | Forward Primer      | TCCCTGTGCACCATTCATCC    |
|                   | Reverse Primer      | CAGGTCCGGTCCACAAAGAA    |
| ENSG00000248932.1 | Forward Primer      | AACGAAGTGCCTAATCCCCG    |
|                   | Reverse Primer      | CTGGAGACTCGTTTCGCCTT    |
| ENST00000440688.1 | Forward Primer      | AGCCACATGGCTCAGGATTC    |
|                   | Reverse Primer      | CGCCACTCCATAGTCACCAG    |
| TCONS_00003661    | Forward Primer      | GGGTGACTCACTGAAGACGG    |
|                   | Reverse Primer      | ATAATCGCACAGGCAGAGGG    |
| ENST00000457302.2 | Forward Primer      | TGTGACCTGAGGGACTGAAC    |
|                   | Reverse Primer      | AAGCCATTAGCCACAGGGAAA   |
| ENST00000592884.1 | Forward Primer      | AATACAAGGATGAGGCCAGCTC  |
|                   | Reverse Primer      | TCTCCCTTAACGACGACTGC    |
| ENST00000399447.3 | Forward Primer      | GCTTCTGGCTGCATTCTAGG    |
|                   | Reverse Primer      | CTCGCTTTCAGAAAACCACCC   |
| ENST00000503186.1 | Forward Primer      | ACGTGCCTGTCTCCATCAAC    |
|                   | Reverse Primer      | GGGGTAGCAGAGACAAGGTG    |
| GAPDH             | Forward Primer      | GGAGCGAGATCCCTCCAAAAT   |
|                   | Reverse Primer      | GGCTGTTGTCATACTTCTCATGG |

Hepatocellular carcinoma (HCC)

chronic hepatitis or Hepatic Cirrhosis (CH)

Healthy Controls (NC)

Plasma Samples

exosome extraction

Human LncRNA Array v3.0 (8 x 60K, Arraystar)

Step 1

Training Set (Quantitive RT-PCR detection of lncRNAs in 20 paired samples)

Threshold: P value < 0.05, CT value < 35 and detection rate > 75%

Step 2

Validation Set (Quantitive RT-PCR detection of lncRNAs in 180 paired samples)

Threshold: P value < 0.05

Step 3

Statistical analysis: (Risk score function, ROC curve of candidate lncRNAs)

Step 4

Subgroup analysis: (Testing the diagnostic value of biomarkers different groups)

# HCC vs NC

Area Under the Curve

| Test Result Variable (s) | Area | Std. Error <sup>a</sup> | Asymptotic Sig. <sup>b</sup> | Asymptotic 95% Confidence Interval |             |
|--------------------------|------|-------------------------|------------------------------|------------------------------------|-------------|
|                          |      |                         |                              | Lower Bound                        | Upper Bound |
| VAR00002                 | .530 | .097                    | .745                         | .340                               | .720        |
| VAR00003                 | .632 | .090                    | .152                         | .456                               | .809        |
| VAR00004                 | .883 | .060                    | .000                         | .765                               | 1.000       |
| VAR00005                 | .400 | .103                    | .279                         | .198                               | .602        |
| VAR00006                 | .818 | .073                    | .001                         | .675                               | .960        |
| VAR00007                 | .933 | .047                    | .000                         | .840                               | 1.025       |

a. Under the nonparametric assumption

b. Null hypothesis: true area = 0.5

# HCC vs CH

Area Under the Curve

| Test Result Variable (s) | Area | Std. Error <sup>a</sup> | Asymptotic Sig. <sup>b</sup> | Asymptotic 95% Confidence Interval |             |
|--------------------------|------|-------------------------|------------------------------|------------------------------------|-------------|
|                          |      |                         |                              | Lower Bound                        | Upper Bound |
| VAR00002                 | .776 | .076                    | .003                         | .627                               | .926        |
| VAR00003                 | .612 | .092                    | .224                         | .431                               | .794        |
| VAR00004                 | .720 | .080                    | .017                         | .563                               | .877        |
| VAR00005                 | .470 | .097                    | .745                         | .280                               | .660        |
| VAR00006                 | .960 | .032                    | .000                         | .897                               | 1.023       |
| VAR00007                 | .970 | .024                    | .000                         | .924                               | 1.016       |

The test result variable(s): VAR00002 has at least one tie between the positive actual state group and the negative actual state group. Statistics may be biased.

a. Under the nonparametric assumption

b. Null hypothesis: true area = 0.5

# HCC-M vs HCC-N

Area Under the Curve

| Test Result Variable (s) | Area | Std. Error <sup>a</sup> | Asymptotic Sig. <sup>b</sup> | Asymptotic 95% Confidence Interval |             |
|--------------------------|------|-------------------------|------------------------------|------------------------------------|-------------|
|                          |      |                         |                              | Lower Bound                        | Upper Bound |
| VAR00002                 | .672 | .087                    | .062                         | .502                               | .843        |
| VAR00003                 | .710 | .082                    | .023                         | .549                               | .871        |
| VAR00004                 | .505 | .104                    | .957                         | .302                               | .708        |
| VAR00005                 | .408 | .091                    | .317                         | .229                               | .586        |
| VAR00006                 | .850 | .065                    | .000                         | .722                               | .978        |
| VAR00007                 | .910 | .056                    | .000                         | .800                               | 1.020       |

a. Under the nonparametric assumption

b. Null hypothesis: true area = 0.5

## HCC vs NC (Validation Set)

Area Under the Curve

| Test Result Variable (s) | Area | Std. Error <sup>a</sup> | Asymptotic Sig. <sup>b</sup> | Asymptotic 95% Confidence Interval |             |
|--------------------------|------|-------------------------|------------------------------|------------------------------------|-------------|
|                          |      |                         |                              | Lower Bound                        | Upper Bound |
| VAR00002                 | .794 | .023                    | .000                         | .749                               | .839        |
| VAR00003                 | .571 | .030                    | .020                         | .512                               | .631        |
| VAR00004                 | .538 | .031                    | .215                         | .477                               | .599        |
| VAR00005                 | .510 | .030                    | .750                         | .450                               | .569        |
| VAR00006                 | .838 | .022                    | .000                         | .794                               | .881        |
| VAR00007                 | .905 | .015                    | .000                         | .876                               | .934        |

The test result variable(s): VAR00007 has at least one tie between the positive actual state group and the negative actual state group. Statistics may be biased.

- a. Under the nonparametric assumption
- b. Null hypothesis: true area = 0.5

## HCC vs CH (Validation Set)

Area Under the Curve

| Test Result Variable (s) | Area | Std. Error <sup>a</sup> | Asymptotic Sig. <sup>b</sup> | Asymptotic 95% Confidence Interval |             |
|--------------------------|------|-------------------------|------------------------------|------------------------------------|-------------|
|                          |      |                         |                              | Lower Bound                        | Upper Bound |
| VAR00002                 | .699 | .027                    | .000                         | .646                               | .753        |
| VAR00003                 | .632 | .029                    | .000                         | .574                               | .689        |
| VAR00004                 | .565 | .030                    | .033                         | .505                               | .624        |
| VAR00005                 | .468 | .030                    | .291                         | .408                               | .527        |
| VAR00006                 | .534 | .030                    | .262                         | .475                               | .594        |
| VAR00007                 | .870 | .018                    | .000                         | .834                               | .905        |

- a. Under the nonparametric assumption
- b. Null hypothesis: true area = 0.5

## HCC-M vs HCC-N (Validation Set)

Area Under the Curve

| Test Result Variable (s) | Area | Std. Error <sup>a</sup> | Asymptotic Sig. <sup>b</sup> | Asymptotic 95% Confidence Interval |             |
|--------------------------|------|-------------------------|------------------------------|------------------------------------|-------------|
|                          |      |                         |                              | Lower Bound                        | Upper Bound |
| VAR00002                 | .729 | .026                    | .000                         | .678                               | .780        |
| VAR00003                 | .762 | .025                    | .000                         | .713                               | .810        |
| VAR00004                 | .588 | .030                    | .004                         | .530                               | .647        |
| VAR00005                 | .546 | .030                    | .128                         | .487                               | .606        |
| VAR00006                 | .721 | .026                    | .000                         | .670                               | .773        |
| VAR00007                 | .893 | .016                    | .000                         | .861                               | .925        |

- a. Under the nonparametric assumption
- b. Null hypothesis: true area = 0.5
